# Supplementary material
Source: PubMed Central journal article supplement (PMC4529069)
Supplement: Supp_Data.pdf [file Supp_Data.pdf]

## Supplementary Data

### Supplementary Materials and Methods

#### Reagents for cell culture

All growth factors and neutralizing antibodies—recombinant human transforming growth factor (TGF)- $\beta$ 3, recombinant human bone morphogenetic protein (BMP)-4, monoclonal mouse TGF- $\beta$ 1/2/3 antibody (anti-TGF- $\beta$ ), monoclonal mouse BMP-4 antibody (anti-BMP-4), and recombinant human TGF- $\beta$ 1—were purchased from R&D Systems (Minneapolis, MN). In addition, the following biochemical supplements were used in cell culture: fetal bovine serum (Gibco, Invitrogen, Carlsbad, CA); penicillin (100 U/mL)–streptomycin (100  $\mu$ g/mL) (Gibco); dexamethasone (G Biosciences, Maryland Heights, MO); L-ascorbic acid 2-phosphate (Sigma-Aldrich, St. Louis, MO); insulin, transferrin, and selenium (BioWhittaker, Lonza, Walkersville, MD); and  $\beta$ -glycerophosphate (Sigma-Aldrich).

#### Synthesis of poly(lactide-co-glycolide) microspheres

Poly(lactide-co-glycolide) (PLG) microspheres were prepared using a double emulsion technique as described previously<sup>1</sup> to encapsulate TGF- $\beta$ 3 (0.4 ng per mg of microspheres), BMP-4 (0.5 ng per mg of microspheres), insulin (1  $\mu$ g per mg of microspheres)–transferrin (1  $\mu$ g per mg of microspheres)–selenium (1 ng per mg of microspheres), BMP-4 (0.5 ng per mg of microspheres),  $\beta$ -glycerophosphate (0.2 mg per mg of microspheres), anti-TGF- $\beta$  (12 ng per mg of microspheres), or anti-BMP-4 (6 ng per mg of microspheres). Briefly, 100  $\mu$ L of aqueous microsphere contents (i.e., the proteins and/or small molecules to be encapsulated within PLG microspheres) was pipetted into 1 mL of 5% PLG (8515DLG7E) (Lakeshore Biomaterials, Birmingham, AL) in ethyl acetate (Sigma-Aldrich), and the mixture was sonicated at an amplitude of 40 (VCX 130; Sonics, Newtown, CT) for 15 s. Then, 1 mL of 1% polyvinyl acetate (PVA; Sigma-Aldrich) in 7% ethyl acetate was added, and the mixture was vortexed at maximum speed for 15 s. The mixture was then transferred into a bath of 0.3% PVA in 7% ethyl acetate and stirred continuously at 500 rpm under a chemical hood for 3 h to promote precipitation of the microspheres by solvent evaporation. The microspheres were then filtered through a 0.2- $\mu$ m-diameter filter (Nalgene, Rochester, NY), collected by centrifugation at 2200 rpm for 10 min (Eppendorf, Hauppauge, NY), lyophilized for 72 h (Labconco, Kansas City, MO), and stored at  $-20^{\circ}\text{C}$ .

#### Synthesis of rhodamine-conjugated silica nanoparticles

A solution of 1% rhodamine isothiocyanate (RITC; Sigma-Aldrich), prepared by dissolving 10 mg RITC, was dissolved in 1 mL of ethanol with 44  $\mu$ L of (3-aminopropyl) trimethoxysilane (Sigma-Aldrich), and a solution 5% tetraethyl orthosilicate (TEOS; Sigma-Aldrich) was prepared by mixing 0.5 mL TEOS with 7.4 mL of anhydrous ethanol, 1 mL of molecular-grade water, and 0.1 mL of ammonium hydroxide ( $\text{NH}_4\text{OH}$ ; Sigma-Aldrich). To conjugate rhoda-

mine to the silica, 100  $\mu$ L of the RITC solution was added into the TEOS solution, and the mixture was rapidly stirred for 24 h. The fluorescent nanoparticles were then collected by centrifugation at 10,000 rpm for 5 min (Eppendorf, Hauppauge, NY) and resuspended in 2 mL of molecular-grade  $\text{H}_2\text{O}$ .

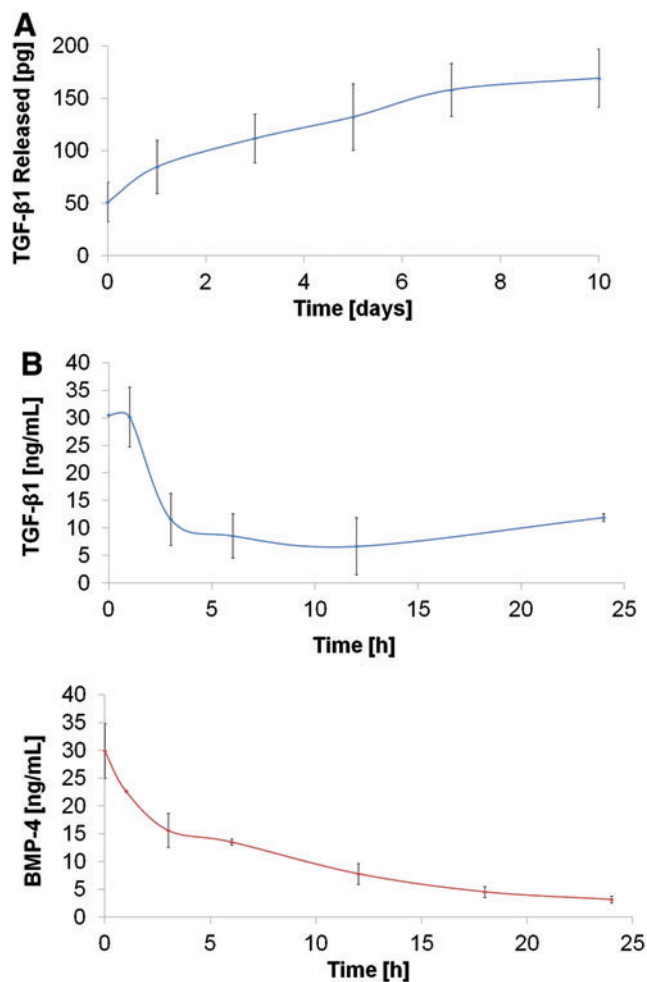

**SUPPLEMENTARY FIG. S1.** Growth factor release and degradation kinetics. **(A)** Cumulative release curve of transforming growth factor (TGF)- $\beta$ 1 from single-layer scaffolds. Scaffolds containing TGF- $\beta$ 1 were incubated in phosphate-buffered saline (PBS) under culture conditions; PBS was collected and replaced after 1, 3, 5, 7, and 10 days; and growth factor concentration in collected PBS was measured by enzyme-linked immunosorbent assay (ELISA) ( $n=4$ ). The TGF- $\beta$ 1 release profile was fitted to a third-order time-dependent polynomial to acquire the protein release function used in mathematical modeling. **(B)** Degradation/uptake profiles of TGF- $\beta$ 1 (upper) and bone morphogenetic protein (BMP)-4 (lower) in the presence of mesenchymal stem cells (MSCs). MSCs were cultured in media containing growth factors, and growth factor concentrations were measured in media by ELISA ( $n=2$ ). Degradation profiles were fitted to exponential decay equations to acquire the half-life of each species.

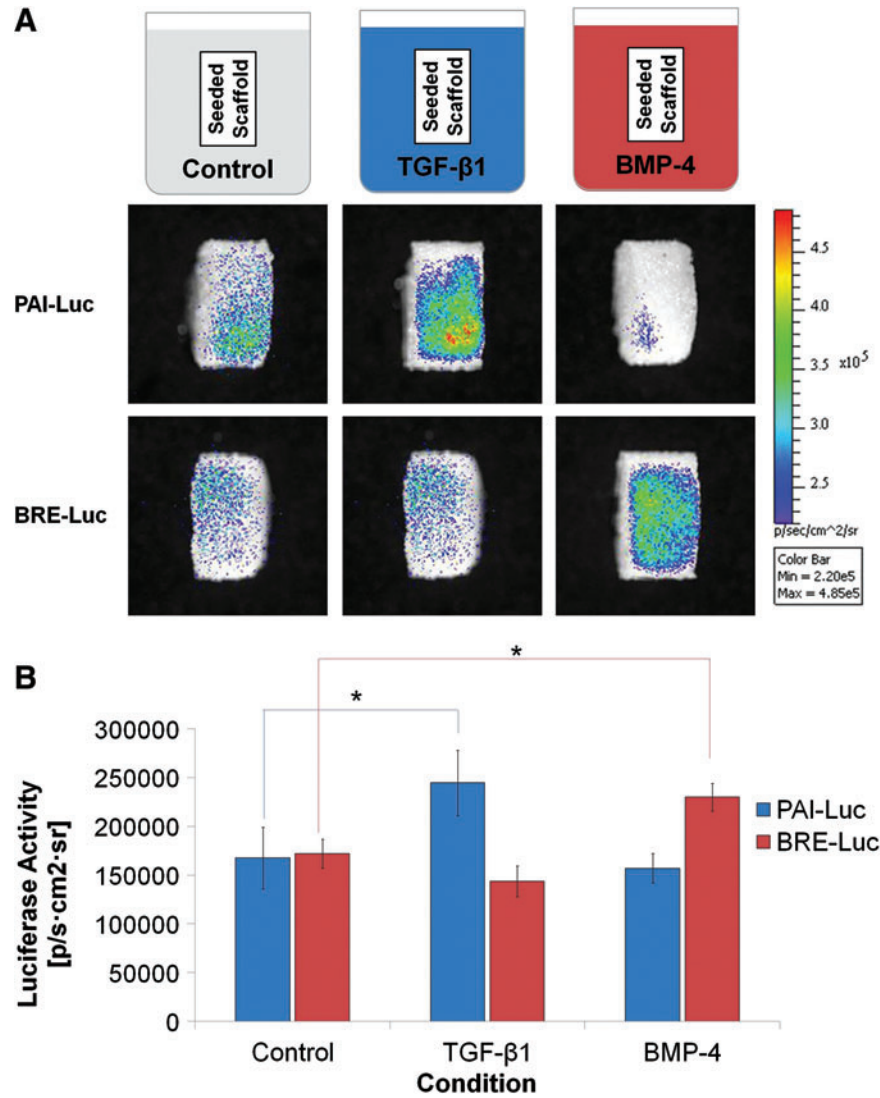

**SUPPLEMENTARY FIG. S2.** Specificity of luciferase reporter cells to TGF-β1 and BMP-4. Single-layer poly(lactide-co-glycolide) scaffolds uniformly seeded with PAI-Luc or BRE-Luc cells were cultured in complete Dulbecco's Modified Essential Media (DMEM) supplemented with no growth factors (*left*), 10 ng/mL TGF-β1 (*center*), or 30 ng/mL BMP-4 (*right*). Luciferase activity was recorded after 24 h. **(A)** Representative images taken with the Xenogen IVIS-200 system. **(B)** Quantification of photon flux density ( $n=3$ ). Asterisks indicate statistical significance at  $p < 0.05$ .

### Three-dimensional printing

Customized scaffold molds were designed in SolidWorks (Dassault Systems, Waltham, MA) using a digital model of an adult human femoral condyle that had been reconstructed from computed tomography imaging (3D ContentCentral; Dassault Systems). Molds were fabricated at the 1:8 anatomical scale in VeroBlue polyjet resin using a Connex500 3D printer (Objet, Billerica, MA).

*Equation 1. Function for protein release from PLG scaffold*

$$C = C_{tot}[(5.748 \times 10^{-19})t^3 - (1.503 \times 10^{-12})t^2 + (1.633 \times 10^{-6})t + 0.0299]$$

Calculated from a third-order polynomial fit for TGF-β1 release from a single-layer PLG scaffold, with  $R^2 = 0.9891$ .

$C$  denotes the cumulative protein released from the scaffold layer in units of g/mL,  $C_{tot}$  represents the total concentration of protein in the scaffold layer after salt leaching in units of g/mL, and  $t$  represents the time after cell seeding in units of s.

### Supplementary References

1. Cohen, S., Yoshioka, T., Lucarelli, M., Hwang, L.H., and Langer, R. Controlled delivery systems for proteins based on poly(lactide/glycolic acid) microspheres. *Pharm Res* **8**, 713, 1991.
2. Young, M.E., Carroad, P.A., and Bell, R.L. Estimation of diffusion coefficients of proteins. *Biotechnol Bioeng* **22**, 947. 1980.
3. Morell, A., Terry, W.D., and Waldman, T.A. Metabolic properties of IgG subclasses in man. *J Clin Invest* **49**, 673, 1970.
4. Yuen, W.W., Du, N.R., Chan, C.H., Silva, E.A., and Mooney, D.J. Mimicking nature by codelivery of stimulant and inhibitor to create temporally stable and spatially restricted angiogenic zones. *Proc Natl Acad Sci U S A* **107**, 17933, 2010.

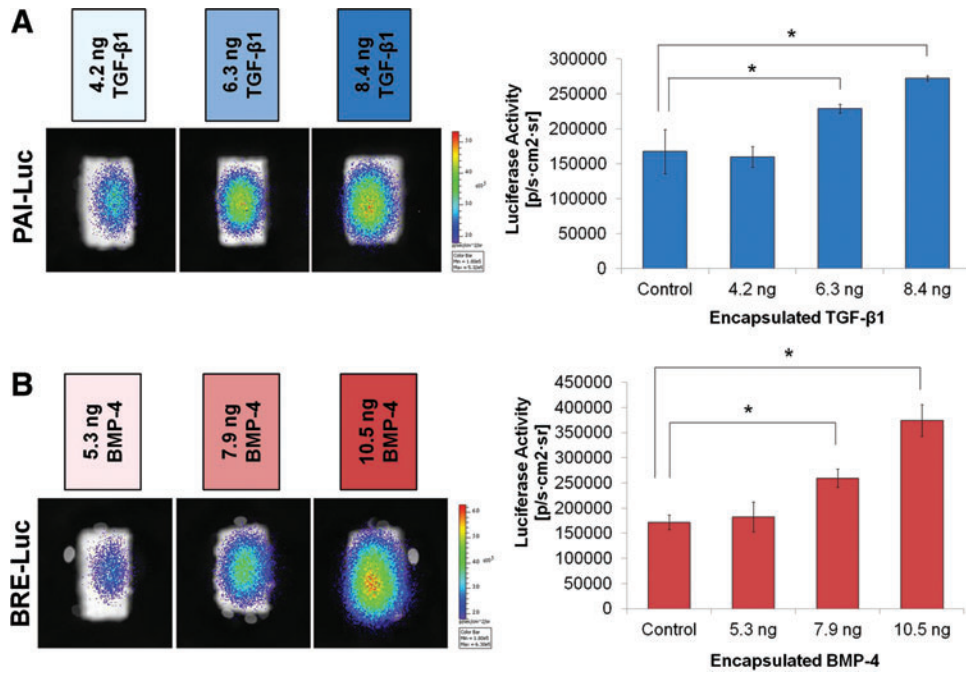

**SUPPLEMENTARY FIG. S3.** Dose responsiveness of luciferase reporter cells to TGF- $\beta$ 1 and BMP-4. Single-layer scaffolds containing increasing quantities of encapsulated TGF- $\beta$ 1 (**A**) or BMP-4 (**B**) were uniformly seeded with PAI-Luc or BRE-Luc cells. Luciferase activity was recorded after 24 h. Representative images taken with the Xenogen IVIS-200 system (*left*) and quantification of photon flux density (*right*) are shown ( $n=4$ ). Asterisks indicate statistical significance at  $p < 0.05$ .

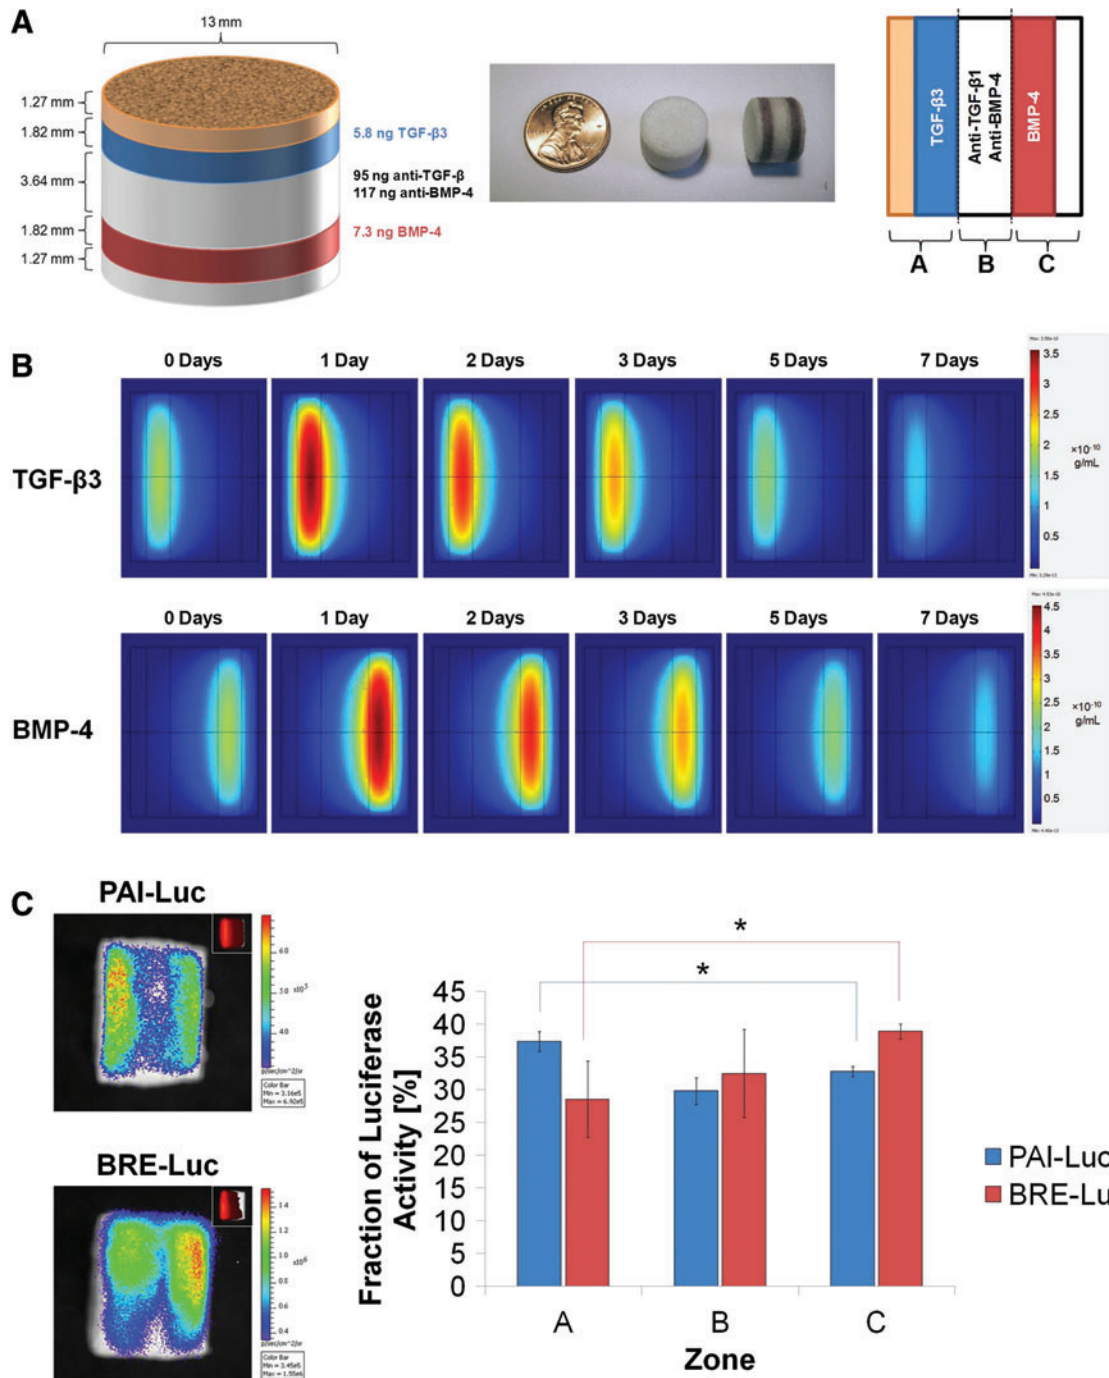

**SUPPLEMENTARY FIG. S4.** Five-layer scaffold with neutralizing antibodies in the middle layer (second-generation design). (A) Schematic of scaffold dimensions and contents after optimization by mathematical modeling (*left*); photographs of five-layer scaffolds, in which selected layers have been labeled with orcein (*middle*); and orientation of scaffolds for mathematical modeling and luciferase imaging (*right*). (B) Slice plots illustrating concentration profiles of TGF- $\beta$ 3 (*upper row*) and BMP-4 (*lower row*) over 7 days, as simulated in COMSOL Multiphysics. Values reported in g/mL. (C) Representative images (*left*) and quantification (*right*) of photon flux density through scaffold zones at 24 h after seeding with PAI-Luc or BRE-Luc cells ( $n=3$  for each reporter line). Asterisks indicate statistical significance at  $p < 0.05$ .

SUPPLEMENTARY TABLE S1. ANTIBODIES USED IN WESTERN BLOTTING

| <i>Target</i>                               | <i>Manufacturer</i>                                  | <i>Dilution factor</i> | <i>Molecular weight (kDa)</i> |
|---------------------------------------------|------------------------------------------------------|------------------------|-------------------------------|
| SRY box 9 (Sox9)                            | Abcam (Cambridge, MA)                                | 1:500                  | 65                            |
| Runt-related transcription factor 2 (Runx2) | Invitrogen (Carlsbad, CA)                            | 1:500                  | 57                            |
| Aggrecan (AGG)                              | Abcam (Cambridge, MA)                                | 1:100                  | 50                            |
| Type II collagen (Col-II)                   | Abcam (Cambridge, MA)                                | 1:500                  | 100                           |
| Bone sialoprotein II (BSP-II)               | Cell Signaling (Danvers, MA)                         | 1:1000                 | 82                            |
| Osteopontin (OPN)                           | Developmental Studies Hybridoma Bank (Iowa City, IA) | 1:500                  | 60                            |
| Type X collagen (Col-X)                     | Abcam (Cambridge, MA)                                | 1:500                  | 66                            |
| $\beta$ -Actin                              | Cell Signaling (Danvers, MA)                         | 1:10,000               | 45                            |



SUPPLEMENTARY TABLE S2. PARAMETERS USED IN MATHEMATICAL MODELING

| Parameter                                                                 | Value                                       | Source                                                   |
|---------------------------------------------------------------------------|---------------------------------------------|----------------------------------------------------------|
| TGF- $\beta$ 3 molecular weight                                           | 25.4 kDa                                    | R&D Systems (Minneapolis, MN)                            |
| TGF- $\beta$ 3 diffusion coefficient in H <sub>2</sub> O                  | $1.2810 \times 10^{-6}$ cm <sup>2</sup> /s  | Young–Carroad–Bell method <sup>2</sup>                   |
| TGF- $\beta$ 3 diffusion coefficient in PLG scaffold                      | $1.1529 \times 10^{-6}$ cm <sup>2</sup> /s  | 90% of H <sub>2</sub> O diffusivity                      |
| BMP-4 molecular weight                                                    | 26 kDa                                      | R&D Systems (Minneapolis, MN)                            |
| BMP-4 diffusion coefficient in H <sub>2</sub> O                           | $1.2647 \times 10^{-6}$ cm <sup>2</sup> /s  | Young–Carroad–Bell method <sup>2</sup>                   |
| BMP-4 diffusion coefficient in PLG scaffold                               | $1.1382 \times 10^{-6}$ cm <sup>2</sup> /s  | 90% of H <sub>2</sub> O diffusivity                      |
| Molecular weight of anti-TGF- $\beta$                                     | 146 kDa                                     | Typical mass of IgG                                      |
| Anti-TGF- $\beta$ diffusion coefficient in H <sub>2</sub> O               | $7.1154 \times 10^{-7}$ cm <sup>2</sup> /s  | Young–Carroad–Bell method <sup>2</sup>                   |
| Anti-TGF- $\beta$ diffusion coefficient in PLG scaffold                   | $6.4039 \times 10^{-7}$ cm <sup>2</sup> /s  | 90% of H <sub>2</sub> O diffusivity                      |
| Molecular weight of anti-BMP-4                                            | 146 kDa                                     | Typical mass of IgG                                      |
| Anti-BMP-4 diffusion coefficient in H <sub>2</sub> O                      | $7.1154 \times 10^{-7}$ cm <sup>2</sup> /s  | Young–Carroad–Bell method <sup>2</sup>                   |
| Anti-BMP-4 diffusion coefficient in PLG scaffold                          | $6.4039 \times 10^{-7}$ cm <sup>2</sup> /s  | 90% of H <sub>2</sub> O diffusivity                      |
| Molecular weight of TGF- $\beta$ 3-antibody complex                       | 171.4 kDa                                   | Molecular weight of TGF- $\beta$ 3 + IgG                 |
| TGF- $\beta$ 3-antibody complex diffusion coefficient in H <sub>2</sub> O | $6.7502 \times 10^{-7}$ cm <sup>2</sup> /s  | Young–Carroad–Bell method <sup>2</sup>                   |
| TGF- $\beta$ 3-antibody complex diffusion coefficient in PLG scaffold     | $6.0752 \times 10^{-7}$ cm <sup>2</sup> /s  | 90% of H <sub>2</sub> O diffusivity                      |
| Molecular weight of BMP-4-antibody complex                                | 172 kDa                                     | Molecular weight of BMP-4 + IgG                          |
| BMP-4-antibody complex diffusion coefficient in H <sub>2</sub> O          | $6.7371 \times 10^{-7}$ cm <sup>2</sup> /s  | Young–Carroad–Bell method <sup>2</sup>                   |
| BMP-4-antibody complex diffusion coefficient in PLG scaffold              | $6.0634 \times 10^{-7}$ cm <sup>2</sup> /s  | 90% of H <sub>2</sub> O diffusivity                      |
| TGF- $\beta$ half-life                                                    | 26831.5 s (7.45 h)                          | Exponential curve fit of ELISA data                      |
| TGF- $\beta$ first-order degradation rate                                 | $2.583 \times 10^{-5}$ s <sup>-1</sup>      | $\frac{\ln(2)}{\text{half life}}$                        |
| BMP-4 half-life                                                           | 28037.4 s (7.79 h)                          | Exponential curve fit of ELISA data                      |
| BMP-4 first-order degradation rate                                        | $2.472 \times 10^{-5}$ s <sup>-1</sup>      | $\frac{\ln(2)}{\text{half life}}$                        |
| Anti-TGF- $\beta$ half-life                                               | 18,14,400 s (21 days)                       | Morell <i>et al.</i> <sup>3</sup>                        |
| Anti-TGF- $\beta$ first-order degradation rate                            | $3.82026 \times 10^{-7}$ s <sup>-1</sup>    | $\frac{\ln(2)}{\text{half life}}$                        |
| Anti-BMP-4 half-life                                                      | 18,14,400 s (21 days)                       | Morell <i>et al.</i> <sup>3</sup>                        |
| Anti-BMP-4 first-order degradation rate                                   | $3.82026 \times 10^{-7}$ s <sup>-1</sup>    | $\frac{\ln(2)}{\text{half life}}$                        |
| TGF- $\beta$ -antibody complex half-life                                  | 18,14,400 s (21 days)                       | Assumed to be same as free antibody                      |
| TGF- $\beta$ -antibody complex first-order degradation rate               | $3.82026 \times 10^{-7}$ s <sup>-1</sup>    | $\frac{\ln(2)}{\text{half life}}$                        |
| BMP-4-antibody complex half-life                                          | 18,14,400 s (21 days)                       | Assumed to be same as free antibody                      |
| BMP-4-antibody complex first-order degradation rate                       | $3.82026 \times 10^{-7}$ s <sup>-1</sup>    | $\frac{\ln(2)}{\text{half life}}$                        |
| $K_D$ for anti-TGF- $\beta$                                               | $7.5 \times 10^{-7}$ g/mL                   | R&D Systems (Minneapolis, MN)                            |
| $k_{on,TGF}$                                                              | $1467 \text{ cm}^3/\text{g} \cdot \text{s}$ | Calculated from $k_{off}$ and $K_D$                      |
| $k_{on,abTGF}$                                                            | $8365 \text{ cm}^3/\text{g} \cdot \text{s}$ | Calculated from $k_{off}$ and $K_D$                      |
| $k_{on,TGF\text{complex}}$                                                | $9831 \text{ cm}^3/\text{g} \cdot \text{s}$ | Calculated from $k_{off}$ and $K_D$                      |
| $k_{off,TGF}$                                                             | $1.641 \times 10^{-4}$ s <sup>-1</sup>      | Stoichiometric equivalent to $k_{off,TGF\text{complex}}$ |
| $k_{off,abTGF}$                                                           | $9.359 \times 10^{-4}$ s <sup>-1</sup>      | Stoichiometric equivalent to $k_{off,TGF\text{complex}}$ |
| $k_{off,TGF\text{complex}}$                                               | $11 \times 10^{-4}$ s <sup>-1</sup>         | Yuen <i>et al.</i> <sup>4</sup>                          |
| $K_D$ for anti-BMP-4                                                      | $2 \times 10^{-6}$ g/mL                     | R&D Systems (Minneapolis, MN)                            |
| $k_{on,BMP}$                                                              | $550 \text{ cm}^3/\text{g} \cdot \text{s}$  | Calculated from $k_{off}$ and $K_D$                      |
| $k_{on,abBMP}$                                                            | $3088 \text{ cm}^3/\text{g} \cdot \text{s}$ | Calculated from $k_{off}$ and $K_D$                      |
| $k_{on,BMP\text{complex}}$                                                | $3639 \text{ cm}^3/\text{g} \cdot \text{s}$ | Calculated from $k_{off}$ and $K_D$                      |
| $k_{off,BMP}$                                                             | $1.663 \times 10^{-4}$ s <sup>-1</sup>      | Stoichiometric equivalent to $k_{off,BMP\text{complex}}$ |
| $k_{off,abBMP}$                                                           | $9.337 \times 10^{-4}$ s <sup>-1</sup>      | Stoichiometric equivalent to $k_{off,BMP\text{complex}}$ |
| $k_{off,BMP\text{complex}}$                                               | $11 \times 10^{-4}$ s <sup>-1</sup>         | Yuen <i>et al.</i> <sup>4</sup>                          |

TGF, transforming growth factor; BMP, bone morphogenetic protein; PLG, poly(lactide-co-glycolide); ELISA, enzyme-linked immunosorbent assay.
